# Supplementary material for: Sustainable Development of Vernacular Residential Architecture: A Case Study of the Karuč Settlement in the Skadar Lake Region of Montenegro
Source: MDPI journal article supplement (doi:10.3390/su14169956), 2022-08-11
Supplement: s1 [file s1]

Archive with 1 entries (1 files):
- sustainability-1726329-supplementary.pdf
